# Supplementary material for: PPARα agonist and metformin co-treatment ameliorates NASH in mice induced by a choline-deficient, amino acid-defined diet with 45% fat
Source: PubMed Central journal article supplement (PMC7658250; doi:10.1038/s41598-020-75805-z), 2020-11-11
Supplement: 41598_2020_75805_MOESM1_ESM.pdf [file 41598_2020_75805_MOESM1_ESM.pdf]

## **SUPPLEMENTARY INFORMATION**

### **PPAR $\alpha$ agonist and metformin co-treatment ameliorates NASH in mice induced by a choline-deficient, amino acid-defined diet with 45% fat**

Shinya Okishio, Kanji Yamaguchi, Hiroshi Ishiba, Nozomi Tochiki, Kota Yano, Aya Takahashi, Seita Kataoka, Keiichiroh Okuda, Yuya Seko, Yu Liu, Hideki Fujii, Daiki Takahashi, Yusuke Ito, Junji Kamon, Atsushi Umemura, Michihisa Moriguchi, Kohichiroh Yasui, Takeshi Okanoue, and Yoshito Itoh

#### **Contents:**

1. Supplementary Table 1. Real time PCR primers for analysis.
2. Supplementary Figures and Legends.

## 1. Supplementary Table 1. Real time PCR primers for analysis.

|                            | Direction | Sequence                |
|----------------------------|-----------|-------------------------|
| ACOX1                      | Forward   | GCCCAACTGTGACTTCCATC    |
|                            | Reverse   | GCCAGGACTATCGCATGATT    |
| BiP                        | Forward   | ACATGGACCTGTTCCGCTCTA   |
|                            | Reverse   | TGGCTCCTTGCCATTGAAGA    |
| Gene                       | Forward   | CCACCACACCTGAAAGCAGAA   |
|                            | Reverse   | GGTGCCCCCAATTTTCATCT    |
| Collagen type 1 $\alpha$ 1 | Forward   | GACATCCCTGAAGTCAGCTGC   |
|                            | Reverse   | TCCCTTGGGTCCCTCGAC      |
| CPT1                       | Forward   | TCCATGCATACCAAAGTGGA    |
|                            | Reverse   | TGGTAGGAGAGCAGCACCTT    |
| CPT2                       | Forward   | GCCCAGCTTCCATCTTTACT    |
|                            | Reverse   | CAGGATGTTGTGGTTTATCCGC  |
| CYP7A1                     | Forward   | GGGAATGCCATTTACTTGGA    |
|                            | Reverse   | GTCCGGATATTCAAGGATGC    |
| FAS                        | Forward   | TACCAGTGCCACAGGAGTCTCA  |
|                            | Reverse   | CGGGTGAGGACGTTTACAAAG   |
| FGF21                      | Forward   | CTGGGGGTCTACCAAGCATA    |
|                            | Reverse   | CACCCAGGATTTGAATGACC    |
| GUS                        | Forward   | GCAGTTGTGTGGGTGAATGG    |
|                            | Reverse   | GGGTCAGTGTGTTGTTGATGG   |
| IL-6                       | Forward   | CCGGAGAGGAGACTTCACAG    |
|                            | Reverse   | TCCACGATTTCCAGAGAAC     |
| MCP-1                      | Forward   | TCAGCCAGATGCAGTTAACGC   |
|                            | Reverse   | TCTGGACCCATTCTTCTTGG    |
| MTP1                       | Forward   | TGAGCGGCTATACAAGCTCAC   |
|                            | Reverse   | CTGGAAGATGCTCTTCTCGC    |
| PPAR $\alpha$              | Forward   | GCAGGTCGTACAGGTCATCA    |
|                            | Reverse   | ACTGCCGTTGTCTGTCACTG    |
| SOD1                       | Forward   | CGGCTTCTCGTCTTGCTCTC    |
|                            | Reverse   | CGAAGTGGATGGTTCCCTGC    |
| SOD2                       | Forward   | CAGACCTGCCTTACGACTATGG  |
|                            | Reverse   | CTCGGTGGCGTTGAGATTGTT   |
| Srebp-1c                   | Forward   | GCGGCTACCGGTCTTCTATCA   |
|                            | Reverse   | GGATGTAGTCGATGGCCTTG    |
| TGF- $\beta$ 1             | Forward   | TTGCCCTCTACAACCAACACAA  |
|                            | Reverse   | GGCTTGCGACCCACGTAGTA    |
| TIMP-1                     | Forward   | CATGGAAAGCCTCTGTGGATATG |
|                            | Reverse   | GATTGTGCAAATTTCCGTTCTT  |
| TNF- $\alpha$              | Forward   | AAGCCTGTAGCCACGTCGTA    |
|                            | Reverse   | AGGTACAACCCATCGGCTGG    |

## 2. Supplementary Figures and Legends

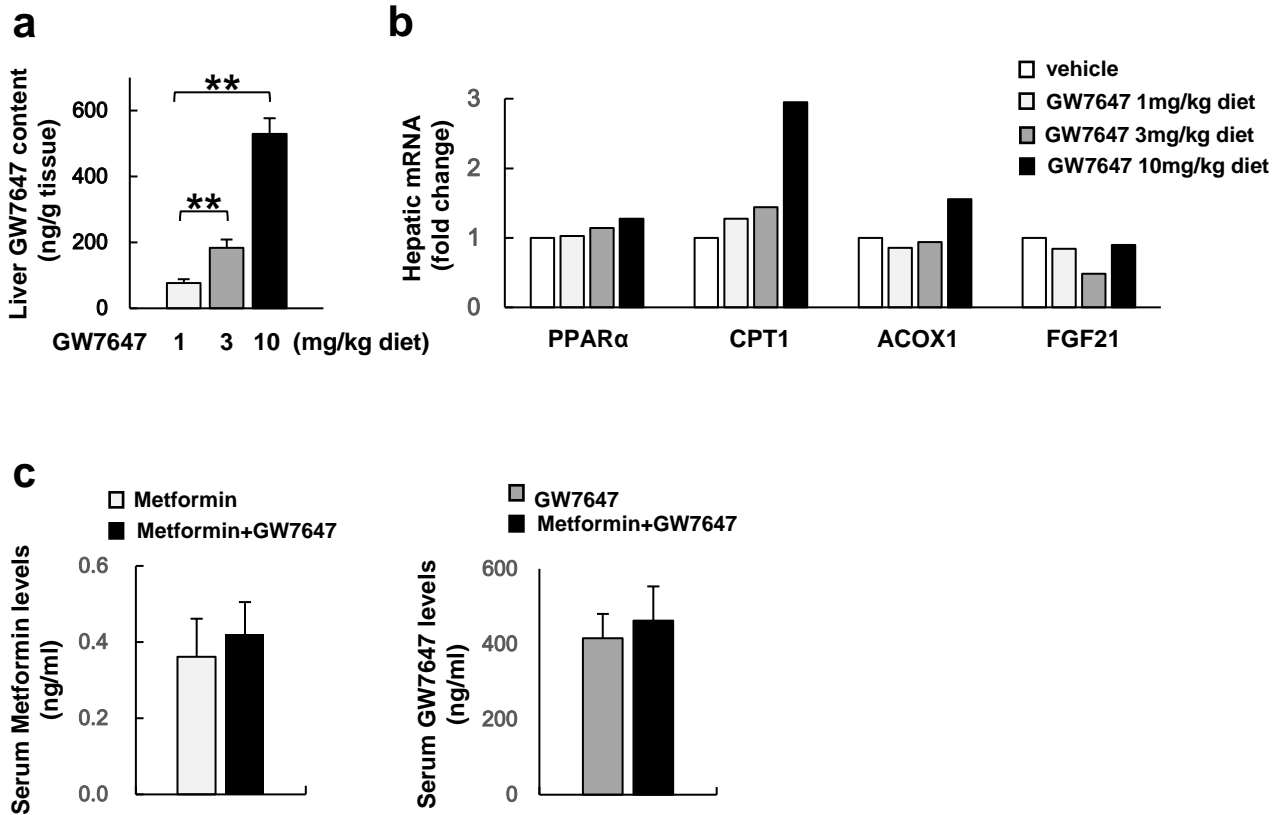

### Supplementary Figure S1. Optimized doses of GW7647 in HF-CDAA.

(a) Liver GW7647 contents after one week-feeding of HF-CDAA diets containing 1mg/kg, 3mg/kg and 10mg/kg GW7647 were measured. Results are expressed per g tissue. Data are presented as Mean  $\pm$  SE from each group (n=3/group). (b) Hepatic mRNA levels of PPAR $\alpha$ , CPT1 and ACOX1 were examined. Results were normalized to glucuronidase expression from each group (n=2/group) (c) At the end of treatments, serum concentration of metformin and GW7647 were measured (n=8/group). \*\*p<0.01.

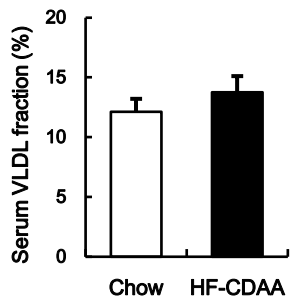

**Supplementary Figure S2.** Serum VLDL were measured in chow and control (Hf-CDAA) groups.

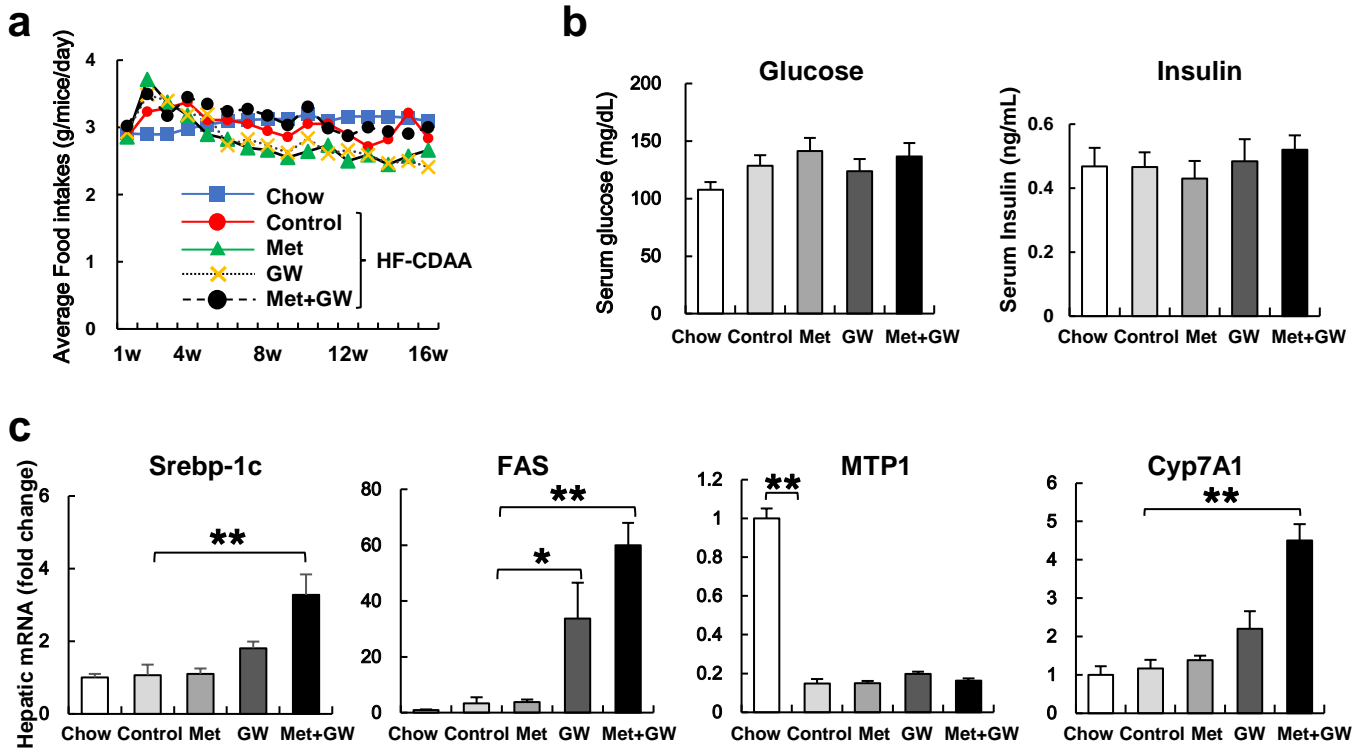

**Supplementary Figure S3.**

(a) Average food intakes in each group are graphed. (b) Serum glucose and insulin were measured in each group (n=8/group). (c) Hepatic mRNA levels of Srebp-1c, FAS and MTP1 and cyp7A1 were examined. Results were normalized to glucuronidase expression from each group (n=8/group).

\*p<0.05, \*\*p<0.01.

**a** p-NF-κB p65 (Ser536) and NF-κB p65 of Figure 3D

**p-NF-κB p65 (Ser536)**

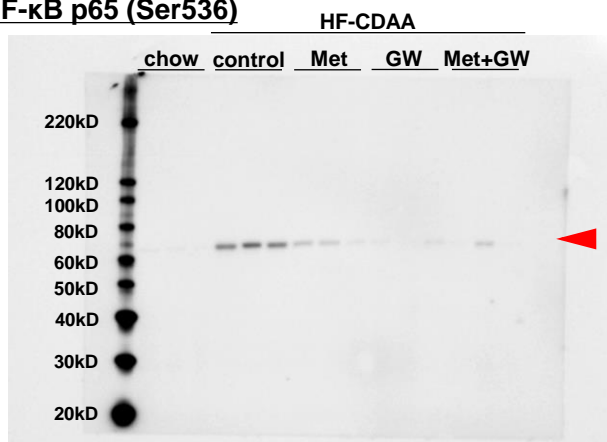

**t-NF-κB p65**

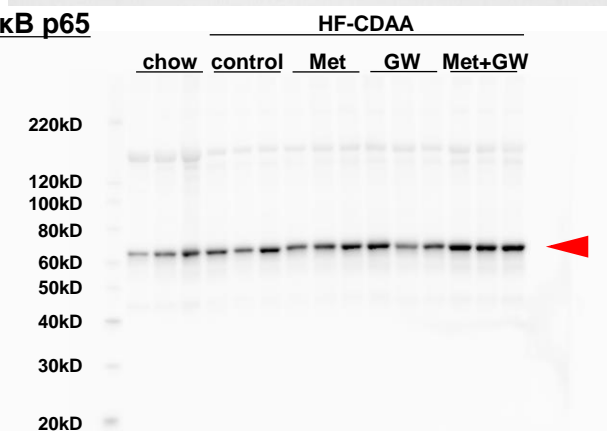

The blot was stripped and re-probed for NF-κB p65 (↑) and β-actin (↓).

**β-actin (42kD)**

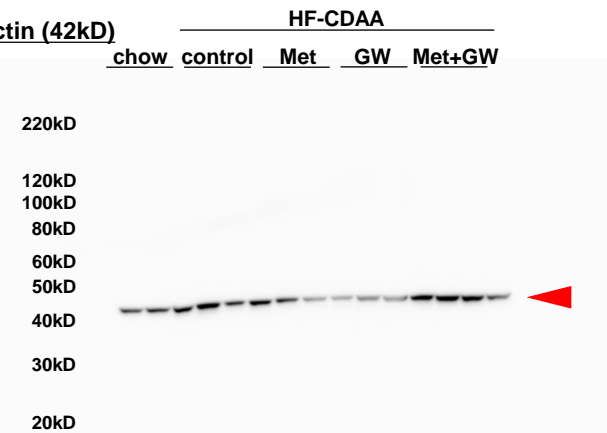

**p-NF-κB p65/ NF-κB p65 ratio**

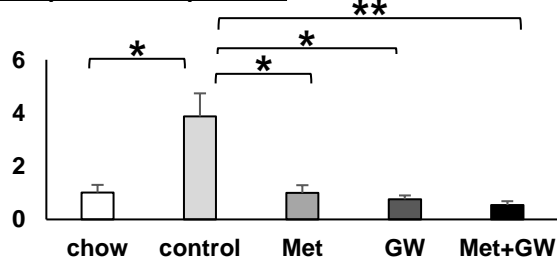

Phosphorylated(p)- NF-κB/NF-κB and p-Erk/Erk ratios in each group were expressed as fold change of chow (\*p<0.05, \*\*p<0.01).

**b** p-Erk1/2 and Erk of Figure 3D

**p-Erk1/2**

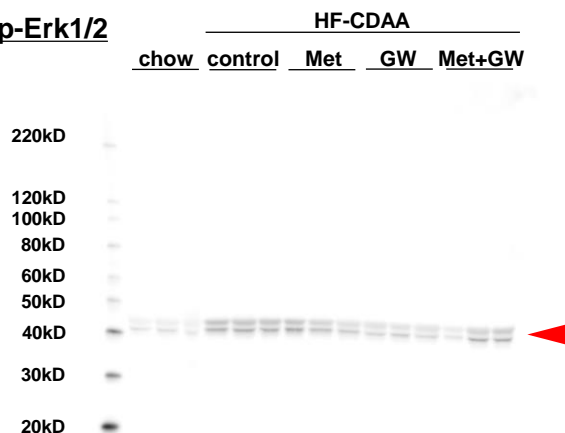

**t-Erk1/2**

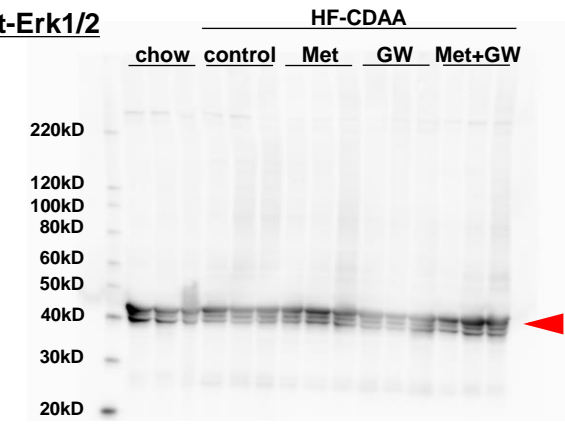

The blot was stripped and re-probed for Erk1/2 (↑) and β-actin (↓).

**β-actin**

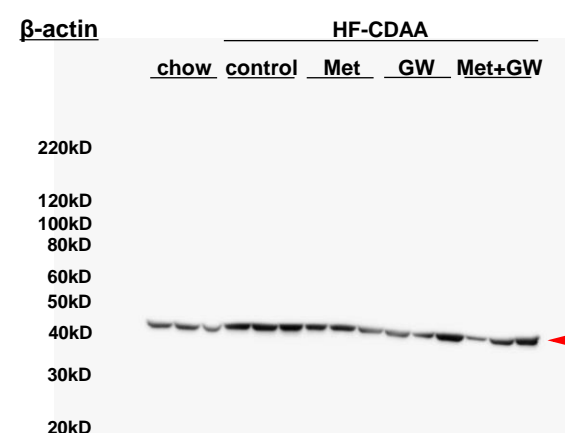

**p-Erk1/2/ ERK1/2 ratio**

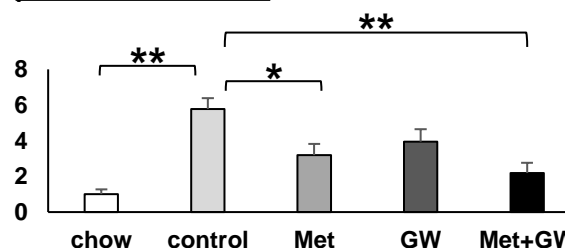

### C p-JNK, JNK and $\beta$ -actin of Figure 3D

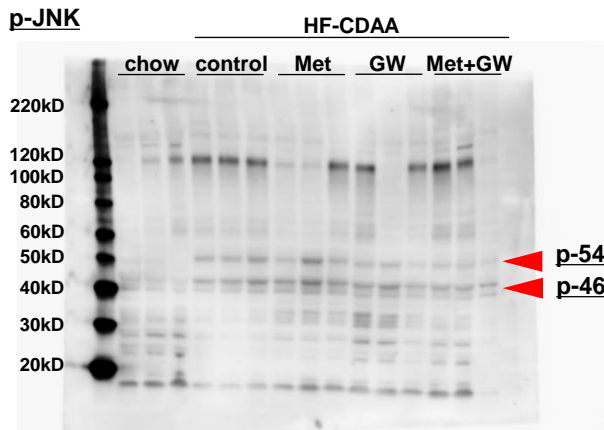

**p-JNK(54kD)/JNK(54kD) ratio**

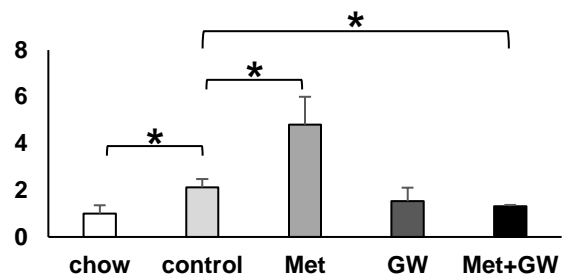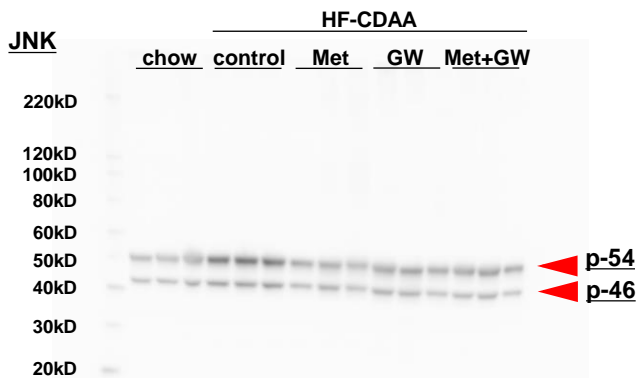

**p-JNK(46kD)/JNK(46kD) ratio**

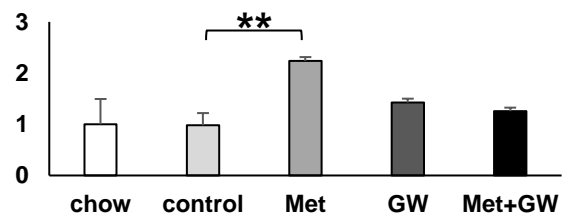

P-JNK/JNK(p54 and p46) ratios were expressed as fold change of chow (\* $p < 0.05$ , \*\* $p < 0.01$ ).

The blot was stripped and re-probed for JNK ( $\uparrow$ ) and  $\beta$ -actin ( $\downarrow$ ).

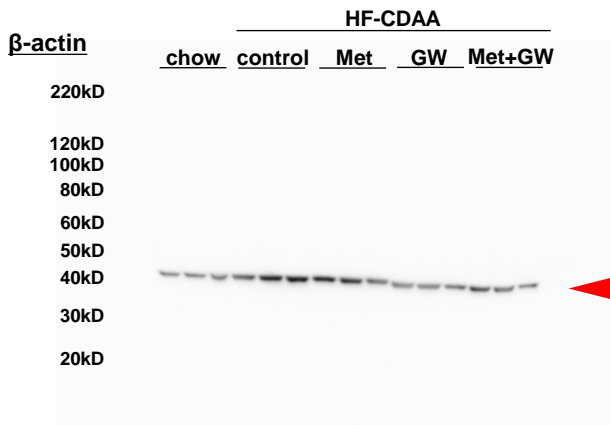

**Supplementary Figure S4.** Uncropped images for which boxed areas are shown in the published panels I of Figure 1 and panels D of Figure 3. (a) Phosphorylated(p)-NF- $\kappa$ B p65/ NF- $\kappa$ B p65, (b) p-Erk1/2/ ERK1/2 and (c) p-JNK(46, 54kD)/JNK(46, 54kD) levels were evaluated by immunoblot analysis of livers from 3 mice/group. Immunoblots of p-NF- $\kappa$ B p65/ NF- $\kappa$ B p65, p-Erk1/2/ ERK1/2 and p-JNK(46, 54kD)/JNK(46, 54kD) were scanned, and band intensities were quantified by Image J (NIH) densitometry analysis. Each ratios were also expressed as fold change of controls. \* $p < 0.05$ , \*\* $p < 0.01$ .

**a** p-AMPK, AMPK and  $\beta$ -actin of Figure 3E

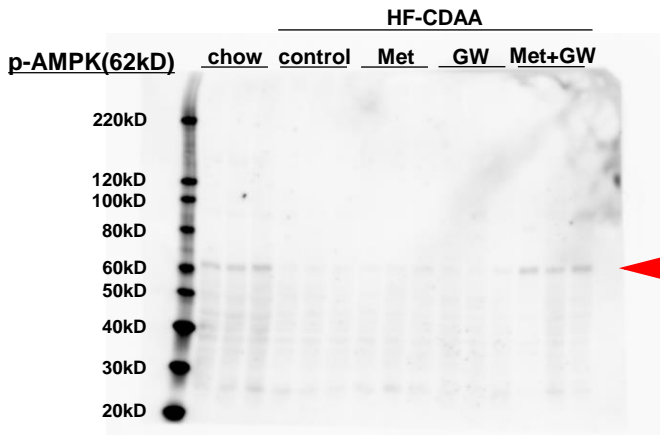

p-AMPK/AMPK ratio

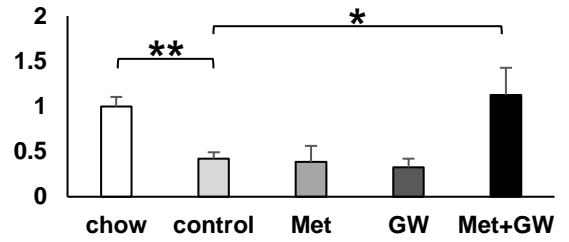

P-AMPK/AMPK ratios were expressed as fold change of chow (\* $p < 0.05$ , \*\* $p < 0.01$ ).

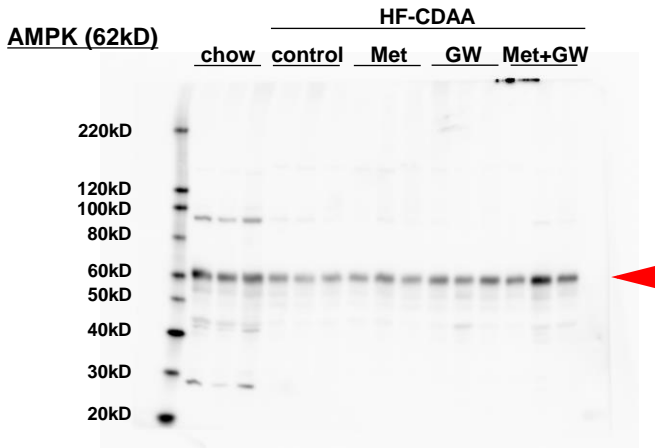

The blot was stripped and re-probed for AMPK ( $\uparrow$ ) and  $\beta$ -actin ( $\downarrow$ ).

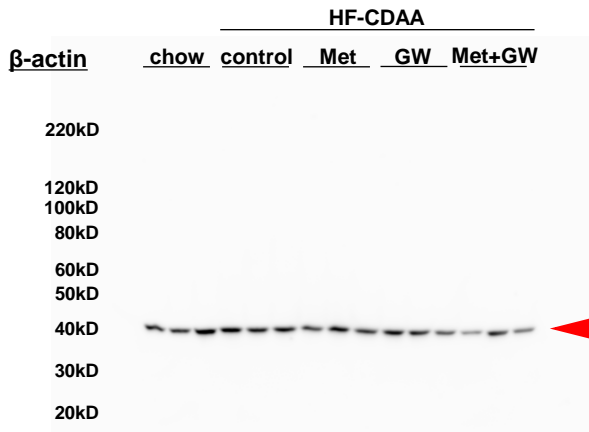



**b** p-IRS-1 (Ser636/639), IRS-1 and  $\beta$ -actin of Figure 3E

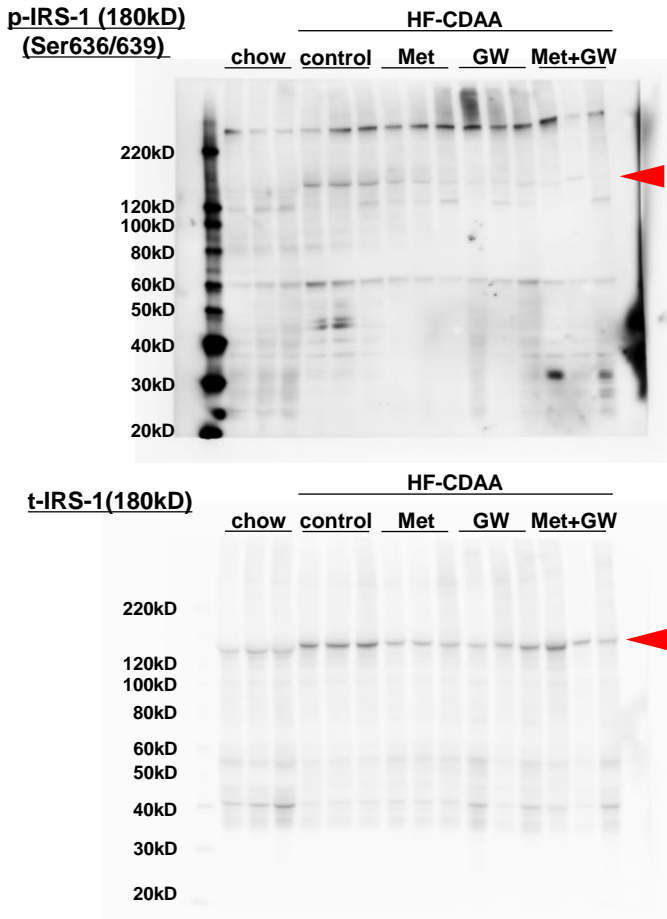

**C** p-IRS-1 (Tyr896), IRS-1 and  $\beta$ -actin of Figure 3D

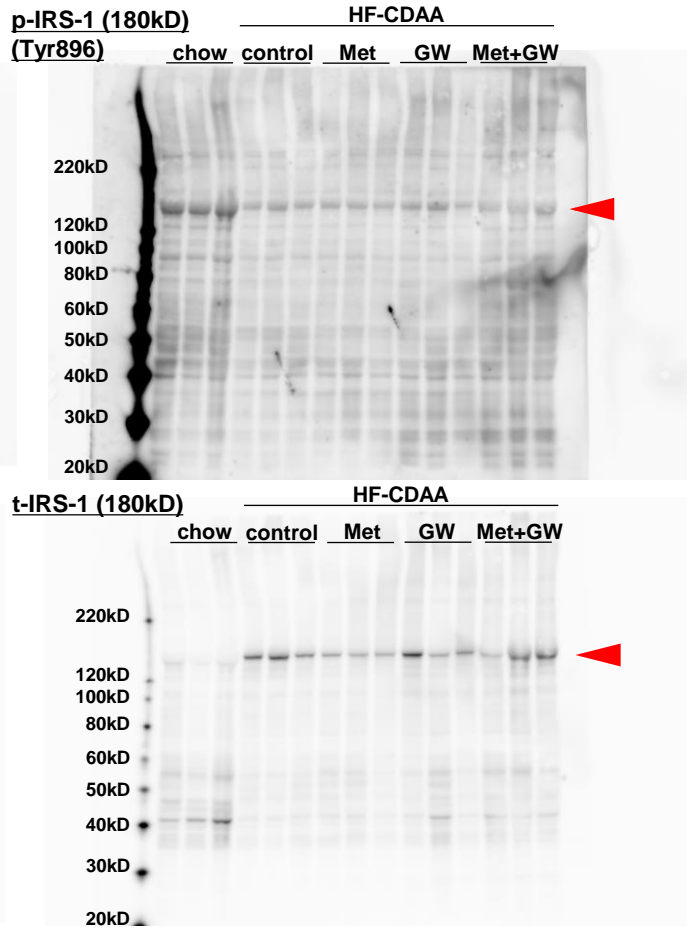

The blot was stripped and re-probed for IRS-1 ( $\uparrow$ ) and  $\beta$ -actin ( $\downarrow$ ).

The blot was stripped and re-probed for IRS-1 ( $\uparrow$ ) and  $\beta$ -actin ( $\downarrow$ ).

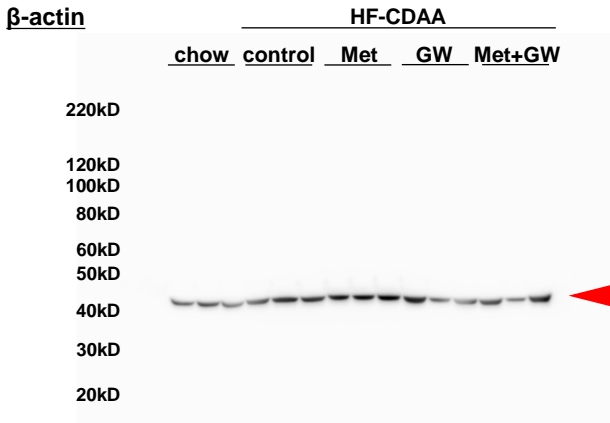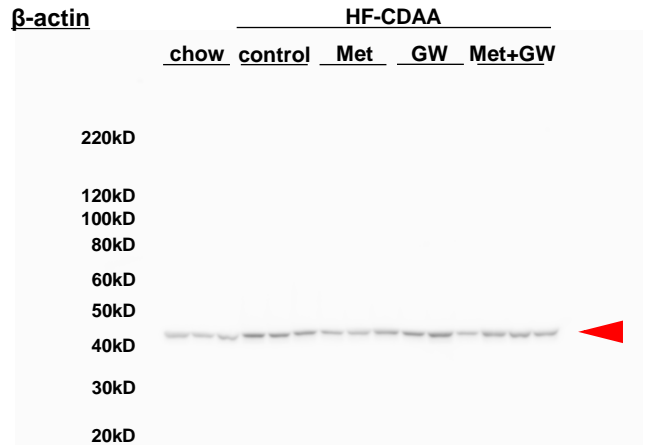

p-IRS-1 (Ser636/639)/ IRS-1 ratio

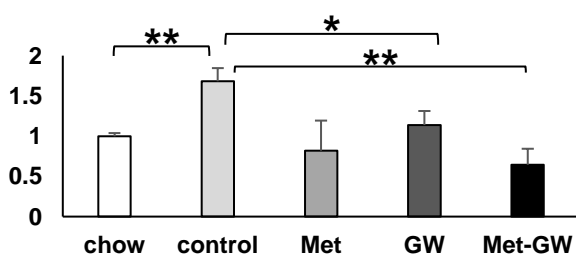

p-IRS-1 (Tyr896)/ IRS-1 ratio

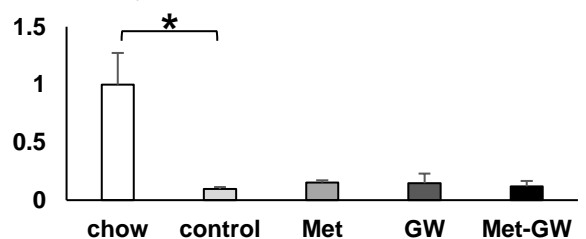

P- IRS-1 at ser636/639 and Tyr896/IRS-1 ratios in each group were expressed as fold change of chow (\* $p$ <0.05, \*\* $p$ <0.01).

**Supplementary Figure S5.** Uncropped images for which boxed areas are shown in the published panels J of Figure 1 and panels E of Figure 3. (a) p-AMPK/ AMPK, (b) p-IRS-1 (Ser636/639)/ IRS-1 and (c) p-IRS-1 (Tyr896)/ IRS-1 levels were evaluated by immunoblot analysis of livers from 3 mice/group. Immunoblots of p-AMPK/ AMPK, p-IRS-1 (Ser636/639)/ IRS-1 and p-IRS-1 (Tyr896)/ IRS-1 were scanned, and band intensities were quantified by Image J (NIH) densitometry analysis. Each ratios were also expressed as fold change of controls. \* $p < 0.05$ , \*\* $p < 0.01$ .

**a** BiP and  $\beta$ -actin of Figure 4D

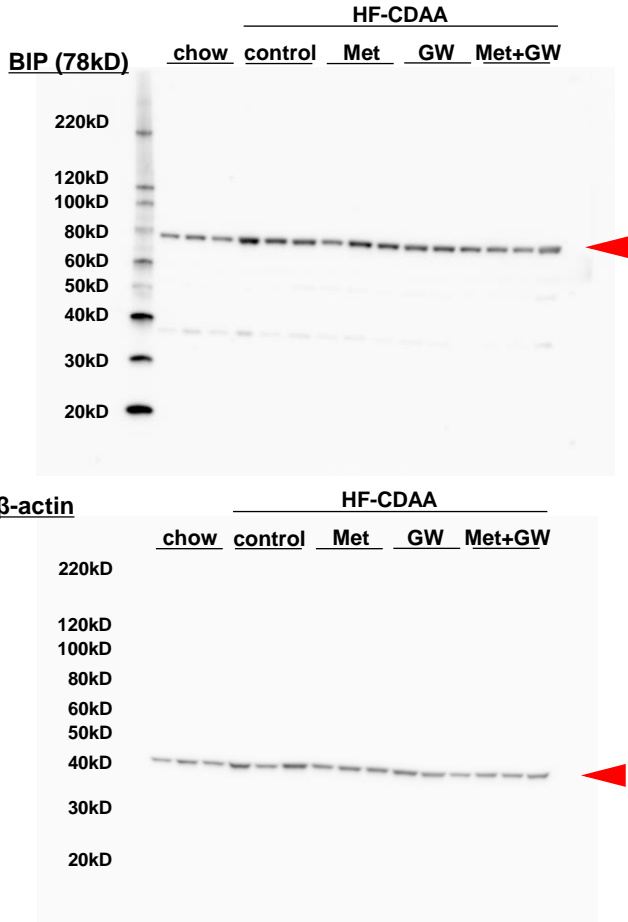

The blot was stripped and re-probed for  $\beta$ -actin ( $\uparrow$ ).

**BiP/  $\beta$ -actin ratio**

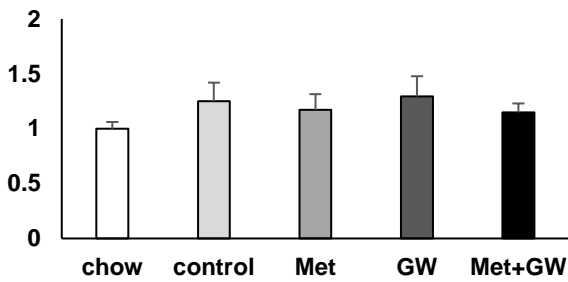

**b** CHOP and  $\beta$ -actin of Figure 4D

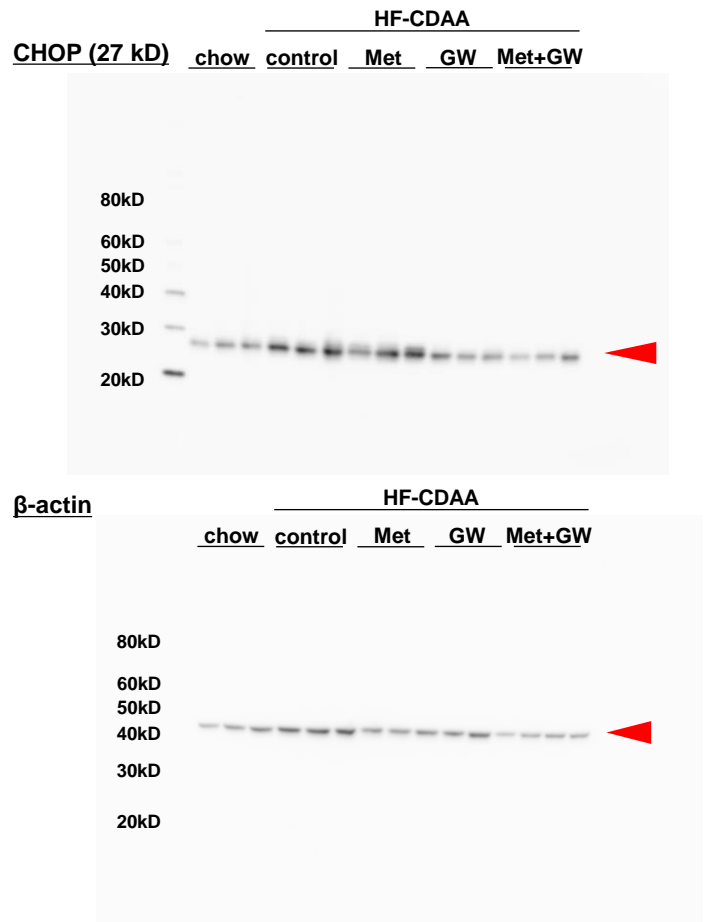

The blot was stripped and re-probed for  $\beta$ -actin ( $\uparrow$ ).

**CHOP/  $\beta$ -actin ratio**

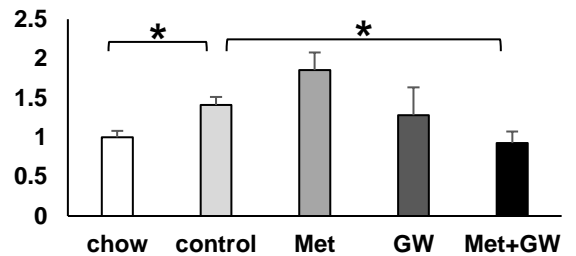

BiP/ $\beta$ -actin and CHOP/ $\beta$ -actin ratios were expressed as fold change of chow (\*p<0.05).

**C** p-eIF2 $\alpha$ , eIF2 $\alpha$  and  $\beta$ -actin of Figure 4D

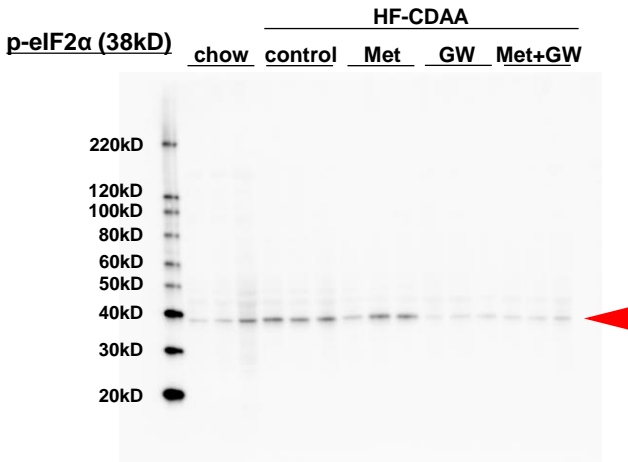

**p-eIF2 $\alpha$ / eIF2 $\alpha$  ratio**

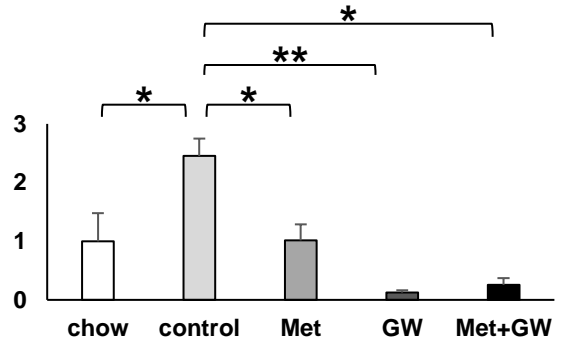

p-eIF2 $\alpha$ / eIF2 $\alpha$  ratios were expressed as fold change of chow (\*p<0.05, \*\*p<0.01).

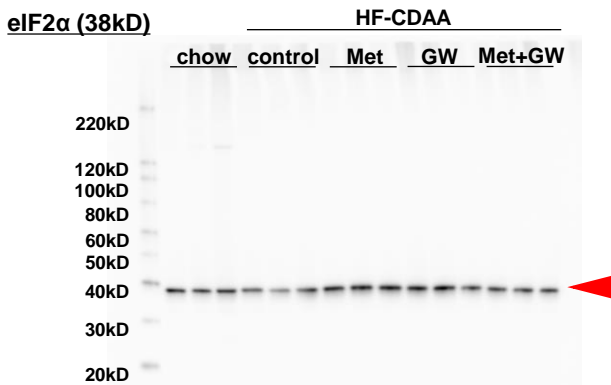

The blot was stripped and re-probed for eIF2 $\alpha$  and then  $\beta$ -actin ( $\downarrow$ ).

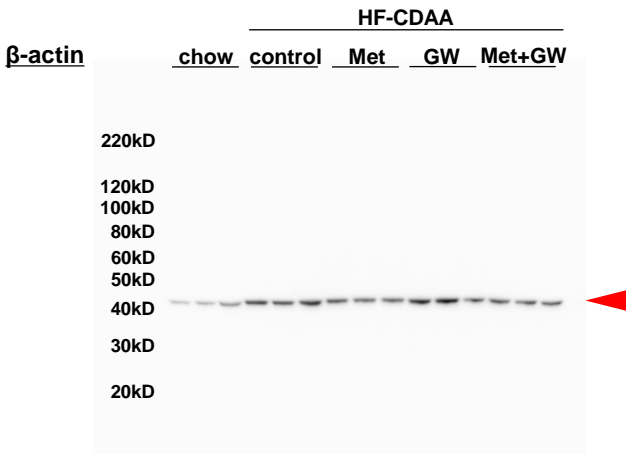

**Supplementary Figure S6.** Uncropped images for which boxed areas are shown in the published panels J of Figure 1 and panels E of Figure 3. (a) BiP, (b) CHOP and (c) p-eIF2 $\alpha$ / eIF2 $\alpha$  levels were evaluated by immunoblot analysis of livers from 3 mice/group. Immunoblots of BiP /  $\beta$ -actin, CHOP/  $\beta$ -actin and p-eIF2 $\alpha$ / eIF2 $\alpha$  were scanned, and band intensities were quantified by Image J (NIH) densitometry analysis. Each ratios were also expressed as fold change of controls. \*p<0.05, \*\*p<0.01.
